# Supplementary material
Source: publisher figshare collection journal article supplement (https://sage.figshare.com/ndownloader/files/20366958)
Supplement: Supplementary file 1 [file 20366958]

## **Supplementary Material 1 - Search Strategy (Pubmed)**

1 Adult [mh]

2 Sedentary [tw]

3 Inactive [tw]

4 Men [tw]

5 Women [tw]

6 (((Adult [mh]) OR Sedentary [tw]) OR Inactive [tw]) OR Men [tw]) OR Women [tw]

7 Wearable Electronic Devices/Fitness Trackers\* [majr]

8 Fitness Trackers/utilization [sh]

9 Accelerometry [mh]

10 Activity tracker [tw]

11 Activity monitor [tw]

12 Fitness monitor [tw]

13 Technology-based system [tw]

14 Fitbit\* [all]

15 Jawbone UP\* [all]

16 Garmin\* [all]

17 Misfit\* [all]

18 Fuelband\* [all]

19 Withings\* [all]

20 SenseWear\* [all]

21 (((((((((((Wearable Electronic Devices/Fitness Trackers\* [majr]) OR Fitness Trackers/utilization [sh]) OR Accelerometry [mh]) OR Activity tracker [tw]) OR Activity monitor [tw]) OR Fitness monitor [tw]) OR Technology-based system [tw]) OR Fitbit\* [all]) OR Jawbone UP\* [all]) OR Garmin\* [all]) OR Misfit\* [all]) OR Fuelband\* [all]) OR Withings\* [all]) OR SenseWear\* [all]

22 Physical exertion [mh]

23 Physical activit\* [tw]

24 Step [tw]

25 ((Physical exertion [mh]) OR Physical activit\* [tw]) OR Step [tw]

26 (((((((Adult [mh]) OR Sedentary [tw]) OR Inactive [tw]) OR Men [tw]) OR Women [tw])) AND (((((((((((Wearable Electronic Devices/Fitness Trackers\* [majr]) OR Fitness Trackers/utilization [sh]) OR Accelerometry [mh]) OR Activity tracker [tw]) OR Activity monitor [tw]) OR Fitness monitor [tw]) OR Technology-based system [tw]) OR Fitbit\* [all]) OR Jawbone UP\* [all]) OR Garmin\* [all]) OR Misfit\* [all]) OR Fuelband\* [all]) OR Withings\* [all]) OR SenseWear\* [all])) AND (((Physical exertion [mh]) OR Physical activit\* [tw]) OR Step [tw]))

## **Supplementary Material 2 – Inclusion and Exclusion Criteria**

### **Types of participants**

The review considered only studies in which participants were aged 18 years and over. Participants who were hospital inpatients, terminally ill, and/or receiving hospice care were excluded, as acute illness or hospitalisation may change PA behaviour.

### **Types of intervention(s)**

The review included interventions whose primary or secondary aim was to change PA behaviour. A fitness tracker must have been used wholly or as part of the intervention. Studies were excluded if the fitness tracker was used to only measure outcomes.

Studies were included if a fitness tracker was used in the intervention and some studies used the fitness tracker as the only intervention component. Interventions that included some form of behavioural counselling were also included. Fitness trackers vary in manufacturer and model but this review is limited to only those which are designed for a consumer, are commercially available and provide feedback on PA through the tracker and/or an associated app. Intervention approaches of included studies were those used to increase participation in all forms of PA and included PA during leisure time, occupationally, within the household and that used for commuting. However, where the intervention included delivery of structured exercise, these studies were excluded. Settings included everyday living and the workplace.

### **Comparator(s)**

The review considered studies that compared the intervention to normal daily physical activities. This comparative was sometimes termed control, waitlist, usual or conventional care. This review considered studies that compared the intervention to provision of literature on PA, the wearing a fitness tracker but blinded to feedback, and other behavioural PA interventions.

### **Outcomes**

The review considered studies that included PA behaviour as an outcome. This included an outcome of physical exertion reported as light, moderate and/or vigorous PA (MET-min/week or MET-min/day), time walking (duration or number of bouts) or energy expenditure (kcal/week or kcal/day), and steps (steps/day). These outcomes were assessed objectively by accelerometer or by self-report.

### **Study Types**

The primary study design of interest for this review was randomised clinical or controlled trials. It considered only studies published in English since 01/01/2010 as the emergence of fitness trackers is a recent phenomenon.

### Supplementary Material 3 – Results of JBI Critical Appraisal Instrument for Randomised Controlled Trials

| Citation                           | Q1 | Q2 | Q3 | Q4 | Q5 | Q6 | Q7 | Q8 | Q9 | Q10 | Q11 | Q12 | Q13 |
|------------------------------------|----|----|----|----|----|----|----|----|----|-----|-----|-----|-----|
| Barwais et al <sup>43</sup>        | Y  | U  | Y  | N  | U  | U  | Y  | U  | Y  | Y   | Y   | Y   | Y   |
| Brakenridge et al <sup>44</sup>    | Y  | Y  | N  | N  | N  | U  | Y  | Y  | Y  | Y   | Y   | Y   | Y   |
| Cadmus-Bertram et al <sup>45</sup> | Y  | U  | Y  | N  | N  | U  | N  | N  | Y  | Y   | Y   | Y   | Y   |
| Finkelstein et al <sup>46</sup>    | Y  | Y  | Y  | N  | U  | Y  | N  | Y  | Y  | Y   | Y   | Y   | Y   |
| Hartman et al <sup>47</sup>        | Y  | Y  | N  | N  | Y  | U  | N  | Y  | Y  | Y   | Y   | Y   | Y   |
| Jakicic et al <sup>48</sup>        | Y  | Y  | Y  | N  | U  | U  | N  | Y  | Y  | Y   | Y   | Y   | Y   |
| Jauho et al <sup>49</sup>          | Y  | U  | Y  | N  | U  | U  | N  | N  | Y  | Y   | Y   | Y   | Y   |
| Kim et al <sup>50</sup>            | U  | U  | Y  | N  | U  | U  | Y  | Y  | Y  | Y   | Y   | Y   | Y   |
| Kooiman et al <sup>51</sup>        | Y  | U  | Y  | N  | U  | U  | Y  | Y  | Y  | U   | Y   | Y   | Y   |
| Lewis et al <sup>52</sup>          | Y  | U  | Y  | N  | U  | U  | N  | Y  | Y  | Y   | Y   | Y   | Y   |
| Li et al <sup>53</sup>             | Y  | U  | Y  | N  | U  | U  | Y  | Y  | Y  | Y   | Y   | Y   | Y   |
| Lystrup et al <sup>54</sup>        | U  | U  | Y  | N  | U  | U  | Y  | U  | Y  | Y   | Y   | Y   | Y   |
| McDermott et al <sup>55</sup>      | Y  | U  | Y  | N  | U  | Y  | Y  | Y  | Y  | Y   | Y   | Y   | Y   |
| Melton et al <sup>56</sup>         | Y  | U  | Y  | N  | U  | U  | N  | Y  | Y  | Y   | Y   | Y   | Y   |
| Pellegrini et al <sup>57</sup>     | Y  | U  | N  | N  | U  | U  | N  | Y  | Y  | Y   | Y   | Y   | Y   |
| Shuger et al <sup>58</sup>         | Y  | U  | Y  | N  | U  | U  | N  | Y  | Y  | Y   | Y   | Y   | Y   |
| Thomas et al <sup>59</sup>         | Y  | U  | Y  | N  | U  | U  | N  | N  | Y  | Y   | Y   | Y   | Y   |
| Thompson et al <sup>60</sup>       | Y  | Y  | Y  | N  | U  | U  | N  | Y  | Y  | Y   | Y   | Y   | Y   |
| Thorndike et al <sup>61</sup>      | Y  | U  | Y  | N  | U  | U  | Y  | Y  | Y  | Y   | Y   | Y   | Y   |
| Uhm et al <sup>62</sup>            | Y  | U  | Y  | N  | U  | U  | N  | Y  | Y  | Y   | Y   | Y   | Y   |

|                            |   |   |   |   |   |   |   |   |   |   |   |   |   |
|----------------------------|---|---|---|---|---|---|---|---|---|---|---|---|---|
| Vidoni et al <sup>63</sup> | Y | U | Y | N | N | U | N | Y | Y | Y | Y | Y | Y |
|----------------------------|---|---|---|---|---|---|---|---|---|---|---|---|---|

#### Supplementary Material 4 - Characteristics of Studies

| Study                              | Country /context /population                               | Participant characteristics<br><i>N</i> (randomized) /mean age (years) /sex (% female)   | Intervention (device) /duration                                                                                                                                                                                                                                      | Control /comparator                                         | Out                              |
|------------------------------------|------------------------------------------------------------|------------------------------------------------------------------------------------------|----------------------------------------------------------------------------------------------------------------------------------------------------------------------------------------------------------------------------------------------------------------------|-------------------------------------------------------------|----------------------------------|
| Barwais et al <sup>43</sup>        | Australia; Home; Sedentary adults                          | 33 (i;18, c;15); 27.8; 33%                                                               | Fitness tracker (Grube Solution) + app<br>4 weeks                                                                                                                                                                                                                    | Normal daily activities                                     | Sed<br>min<br>PA<br>Self<br>vers |
| Brakenridge et al <sup>44</sup>    | Australia; Workplace (single organisation); Office workers | 153 (i <sub>1</sub> ;66, i <sub>2</sub> ;87); 38.9; 46%                                  | Fitness tracker (LUMObac) + app + organisational wellness program<br>3 months<br>12-month follow-up                                                                                                                                                                  | Organisational wellness program                             | Sitt<br>bou<br>star<br>Obj       |
| Cadmus-Bertram et al <sup>45</sup> | USA; Home; Inactive, overweight post-menopausal women      | 51 (i <sub>1</sub> ;25, i <sub>2</sub> ;26); 60.9; 100%                                  | Fitness tracker (Fitbit One) + app + individualised goals + 1 x follow-up call at 4 weeks<br>16 weeks                                                                                                                                                                | Pedometer + printed materials + brief goal setting guidance | Ligh<br>cou<br>Obj<br>acc        |
| Finkelstein et al <sup>46</sup>    | Singapore; Workplace (multiple organisations); Employees   | 800 (i <sub>1</sub> ; 203, i <sub>2</sub> ; 199, i <sub>3</sub> ; 197, c;201); 35.5; 53% | (i <sub>1</sub> ); Fitness tracker (Fitbit Zip) + app + printed materials<br>(i <sub>2</sub> ); Fitness tracker + app + printed materials + charity donation incentive<br>(i <sub>3</sub> ); Fitness tracker + app + printed materials + cash incentive<br>12 months | Printed materials                                           | MV<br>Obj<br>acc                 |
| Hartman et al <sup>47</sup>        | USA; Home; Inactive, overweight women, aged                | 54 (i;36, c;18); 59.5; 100%                                                              | Fitness tracker (Fitbit One) + MyFitnessPal app + 12 x coaching calls                                                                                                                                                                                                | U.S. Dietary Guidelines for Americans + 2 x follow-up calls | MV<br>Obj<br>acc                 |

|                               |                                                           |                                                           |                                                                                                                                                                                                                            |                                                                                                                                                                   |                         |
|-------------------------------|-----------------------------------------------------------|-----------------------------------------------------------|----------------------------------------------------------------------------------------------------------------------------------------------------------------------------------------------------------------------------|-------------------------------------------------------------------------------------------------------------------------------------------------------------------|-------------------------|
|                               | >40 yrs with elevated breast cancer risk                  |                                                           | 6 months                                                                                                                                                                                                                   |                                                                                                                                                                   |                         |
| Jakicic et al <sup>48</sup>   | USA; Home; Overweight adults aged 18-35 yrs               | 471 (i <sub>1</sub> ;237, i <sub>2</sub> ;234); 30.9; 71% | 0-6 months; group-based dietary intervention + exercise prescription<br><br>7-24 months; Fitness tracker (FIT Core) + app + group-based dietary intervention + weekly text messages + monthly phone calls<br><br>24 months | 0-6 months, as per intervention<br><br>7-24 months as per intervention except no fitness tracker. Self-report of daily MVPA via a website designed for the study. | Sed<br>sed<br>MV<br>Obj |
| Jauho et al <sup>49</sup>     | Finland; Home; Young adult males                          | 276 (i;137, c;139); 17.9; 100% male                       | Fitness tracker (Polar Active)<br><br>3 months                                                                                                                                                                             | Blinded fitness tracker                                                                                                                                           | Sitt<br>Self            |
| Kim et al <sup>50</sup>       | USA; Home; College students                               | 187 (i;101, c;86); 20.6; 62%                              | Fitness tracker (Misfit Flash) + app<br><br>13 weeks                                                                                                                                                                       | Normal, daily activities                                                                                                                                          | Sed<br>PA;<br>Obj       |
| Kooiman et al <sup>51</sup>   | Netherlands; Home; Type 2 diabetic adults                 | 72 (i;40, c;32); 56.4; 47%                                | Fitness tracker (Fitbit Zip) + eHealth program<br><br>3 months                                                                                                                                                             | Normal daily activities                                                                                                                                           | MV<br>Self              |
| Lewis et al <sup>52</sup>     | USA; Home; Inactive, overweight, older adults             | 40 (i <sub>1</sub> ;20, i <sub>2</sub> ;20); 63.7; 75%    | Fitness tracker (Jawbone UP24) + app<br><br>3 months                                                                                                                                                                       | Pedometer + activity log                                                                                                                                          | MV<br>Obj               |
| Li et al <sup>53</sup>        | USA; Home; Older adults with knee osteoarthritis          | 34 (i;17, c;17); 55.5; 82%                                | Fitness tracker (Fitbit Flex) + app + education session + 4 x follow up calls<br><br>1 month                                                                                                                               | Normal, daily activities                                                                                                                                          | Sed<br>Obj              |
| Lystrup et al <sup>54</sup>   | USA; Military medical school; First year medical students | 107 (i;50, c;57); 25.4; 37%                               | Fitness tracker (Fitbit Zip) + app<br><br>1 year                                                                                                                                                                           | Normal, daily activities                                                                                                                                          | Step<br>Obj             |
| McDermott et al <sup>55</sup> | USA; Home; Adults with lower-extremity                    | 200 (i;99, c;101); 70.3; 53%                              | Fitness tracker (Fitbit Zip) + 4 x weekly supported sessions + diminishing follow-up phone calls                                                                                                                           | Normal, daily activities                                                                                                                                          | Acc<br>Obj              |

|                                |                                               |                                                                                   |                                                                                                                                                                                                                                                            |                                              |                    |
|--------------------------------|-----------------------------------------------|-----------------------------------------------------------------------------------|------------------------------------------------------------------------------------------------------------------------------------------------------------------------------------------------------------------------------------------------------------|----------------------------------------------|--------------------|
|                                | peripheral artery disease                     |                                                                                   | 9 months                                                                                                                                                                                                                                                   |                                              |                    |
| Melton et al <sup>56</sup>     | USA; Home; Female, African-American students  | 69 (i <sub>1</sub> ;28, i <sub>2</sub> ;41); 19.7; 100%                           | Fitness tracker (Jawbone UP) + app + weekly e-mails<br>6 weeks<br>8-week follow up                                                                                                                                                                         | Diet app + weekly e-mails                    | Acc<br>Obj<br>acco |
| Pellegrini et al <sup>57</sup> | USA; Home; Inactive, overweight adults        | 51 (i <sub>1</sub> ;17, i <sub>2</sub> ;17, i <sub>3</sub> ; 17); 44.2; 86%       | (i <sub>1</sub> ); Fitness tracker (BodyMedia Fit) + app + e-mailed goals + supported telephone calls<br><br>(i <sub>2</sub> ); Fitness tracker + Standard behavioural weight loss<br><br>6 months                                                         | Standard behavioural weight loss             | Ene<br>Self<br>que |
| Shuger et al <sup>58</sup>     | USA; Home; Inactive, overweight adults        | 197 (i <sub>1</sub> ;49, i <sub>2</sub> ;49, i <sub>3</sub> ;49, c;50); 46.9; 81% | (i <sub>1</sub> ); Fitness tracker (Sensewear armband + wristwatch) + app<br><br>(i <sub>2</sub> ); Group-based behavioural weight loss program only 14 sessions + 6 x telephone<br><br>(i <sub>3</sub> ); i <sub>1</sub> + i <sub>2</sub><br><br>9 months | Printed materials                            | Ene<br>Obj         |
| Thomas et al <sup>59</sup>     | USA; Home; Overweight adults                  | 271 (i <sub>1</sub> ; 91, i <sub>2</sub> ;94, c; 86); 55.0; 77%                   | (i <sub>1</sub> ); Fitness tracker (ActiveLink) + app + Weight Watchers Online program<br><br>(i <sub>2</sub> ); Weight Watchers Online program only<br><br>12 months                                                                                      | Printed materials                            | MV<br>Obj          |
| Thompson et al <sup>60</sup>   | USA; Home; Inactive, overweight, older adults | 49 (i;25, c;24); 79.5; 81%                                                        | Fitness tracker (Fitbit) + printed materials + bi-monthly counselling<br><br>6 months                                                                                                                                                                      | Blinded fitness tracker                      | Pro<br>Obj<br>acco |
| Thorndike et al <sup>61</sup>  | USA; Hospital; Physicians                     | 104 (i;52, c;52); 29.0; 54%                                                       | <b>Phase 1 only</b><br><br>Fitness tracker (Fitbit) + app<br><br>6 weeks                                                                                                                                                                                   | Blinded fitness tracker                      | Step<br>Obj        |
| Uhm et al <sup>62</sup>        | Korea; Home; Post-treatment                   | 356 (i <sub>1</sub> ;179, i <sub>2</sub> ;177); 50.3; 100%                        | Fitness tracker (InBodyBand) + app + prescribed activity goal<br><br>3 months                                                                                                                                                                              | Prescribed activity goal + printed materials | Ene<br>Self        |

|                            |                                                                        |                            |                                                                                                  |                         |             |
|----------------------------|------------------------------------------------------------------------|----------------------------|--------------------------------------------------------------------------------------------------|-------------------------|-------------|
|                            | breast cancer survivors                                                |                            |                                                                                                  |                         |             |
| Vidoni et al <sup>63</sup> | USA; Home; Mild-very mild cognitively impaired, inactive, older adults | 30 (i;14, c;16); 71.5; 57% | Fitness tracker (Fitbit Zip) + app + prescribed activity goal + printed materials<br><br>8 weeks | Blinded fitness tracker | Step<br>Obj |
